# Supplementary material for: Hexacyanometallates for sodium-ion batteries: insights into higher redox potentials using d electronic spin configurations
Source: Royal Society of Chemistry journal article supplement (doi:10.1039/c7cp00378a), 2017-01-01
Supplement: c7cp00378a1.pdf [file c7cp00378a1.pdf]

## Electronic Supplementary Information

# Hexacyanometallates for Sodium-Ion Batteries: Insights into Higher Redox Potentials Using $d$ Electronic Spin Configurations

*Duho Kim,<sup>a</sup> Taesoon Hwang,<sup>a</sup> Jin-Myoung Lim,<sup>a</sup> Min-Sik Park,<sup>\*b</sup> Maenghyo Cho,<sup>\*a</sup> and  
Kyeongjae Cho<sup>\*c</sup>*

<sup>a</sup> Department of Mechanical and Aerospace Engineering, Seoul National University, Gwanak-ro 1, Gwanak-gu, Seoul 08826, Republic of Korea.

<sup>b</sup> Department of Advanced Materials Engineering for Information and Electronics, Kyung Hee University, 1732 Deogyong-daero, Giheung-gu, Yongin 17104, Republic of Korea.

<sup>c</sup> Department of Materials Science and Engineering and Department of Physics, the University of Texas at Dallas, Richardson, TX 75080, USA.

| Compound | Lattice parameters |        |         |         | R <sub>wp</sub> | R <sub>exp</sub> |
|----------|--------------------|--------|---------|---------|-----------------|------------------|
|          | a (Å)              |        | c (Å)   |         |                 |                  |
|          | Exp.               | DFT    | Exp.    | DFT     |                 |                  |
| NFMCN    | 6.5788             | 6.5803 | 18.9286 | 19.4447 | 5.77            | 6.42             |

**Table S1** Comparison of lattice parameters of NFMCN obtained from Rietveld refinement results and First-principles calculation.

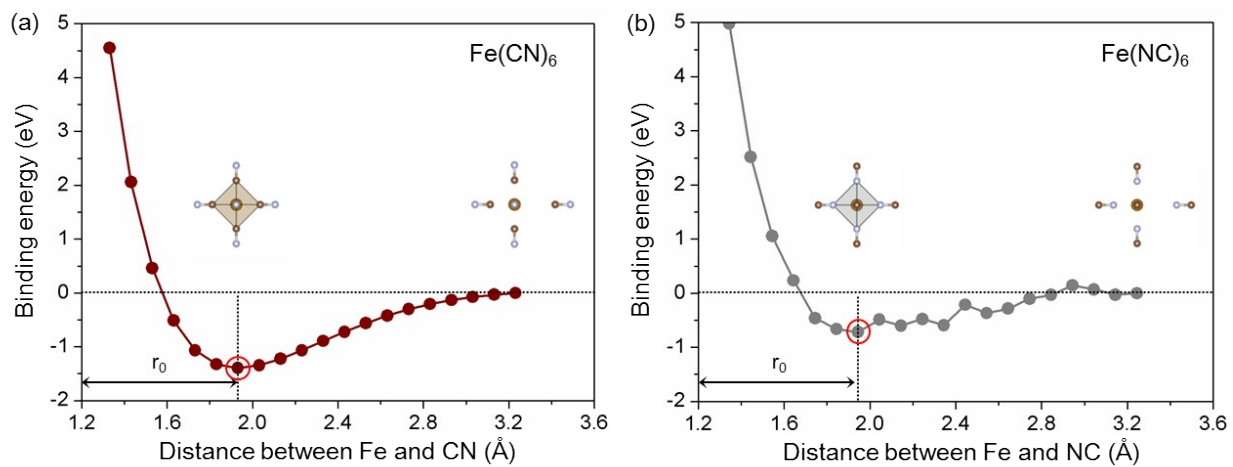

**Fig. S1** Binding energy curves as a function of distance between Fe and (a) CN and (b) NC.  $r_0$  refers to the distance at equilibrium state indicated as red circle.

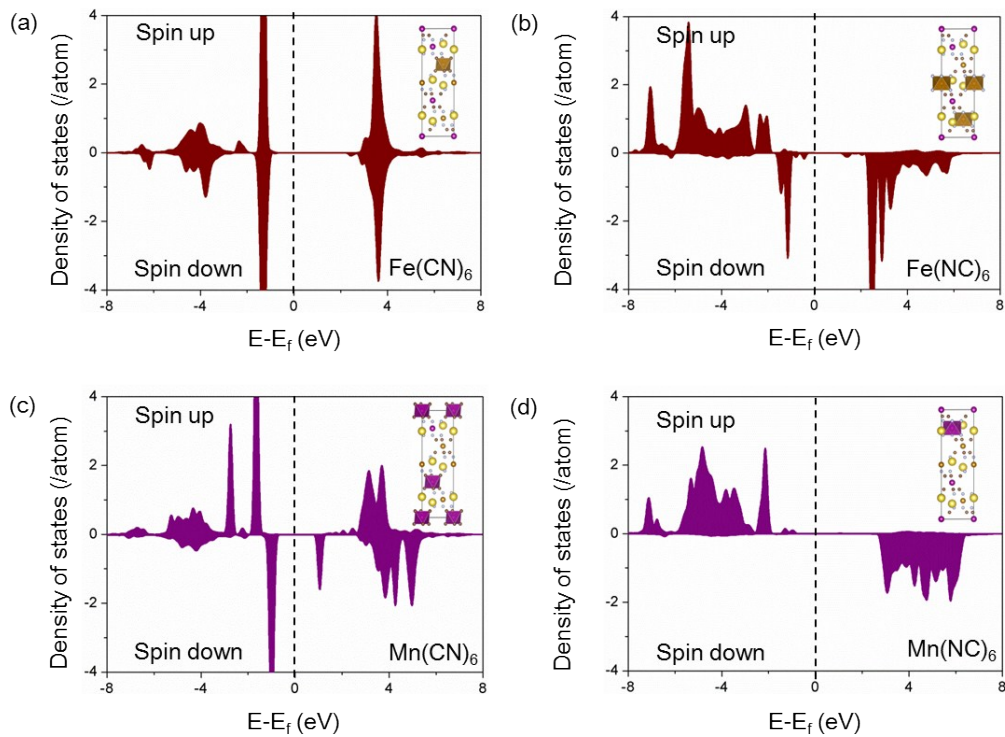

**Fig. S2** The projected partial density of states (PDOS) of 3d electrons based on a sampled intermediate phase between the lowest and highest mixing enthalpy in  $\text{Na}_2\text{FeMn}(\text{CN})_6$  from Fig. 2a.

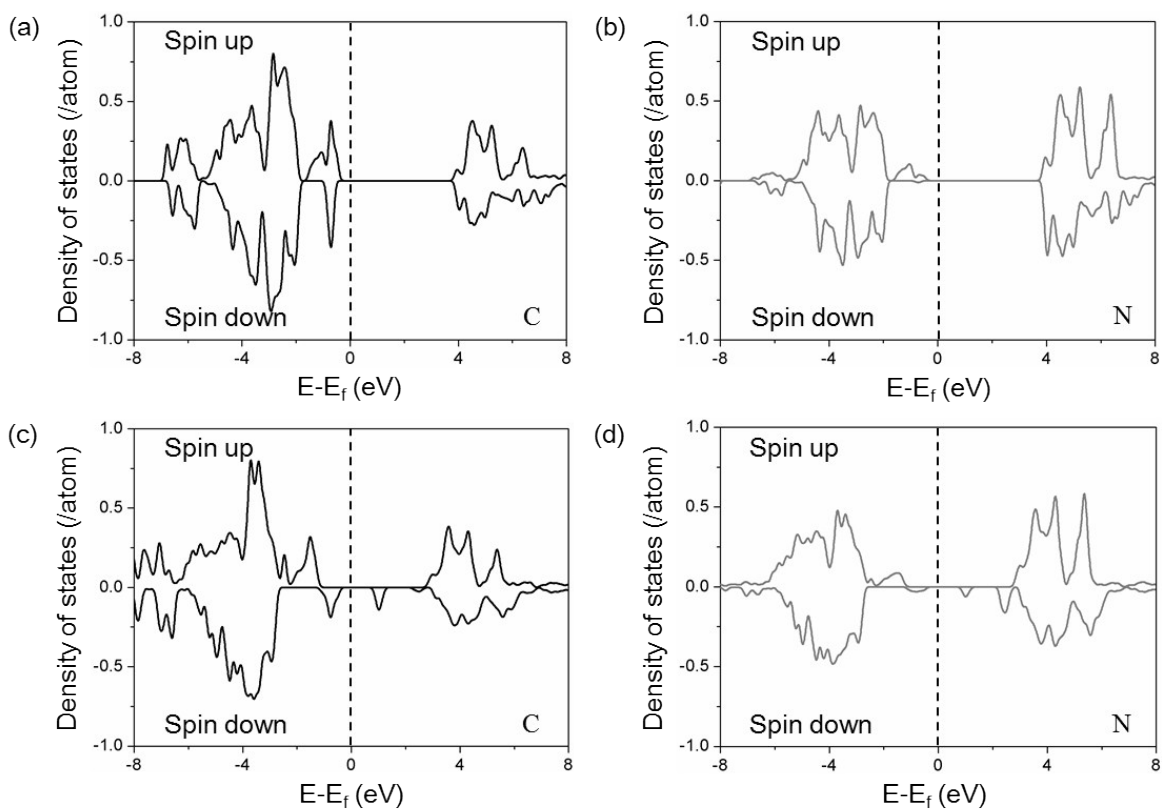

**Fig. S3** The projected partial density of states (PDOS) of  $2p$  electrons based on the phase of lowest mixing enthalpy ((a) C and (b) N) and the phase of highest mixing enthalpy ((c) C and (d) N) from Fig. 2a in  $\text{Na}_2\text{FeMn}(\text{CN})_6$ .

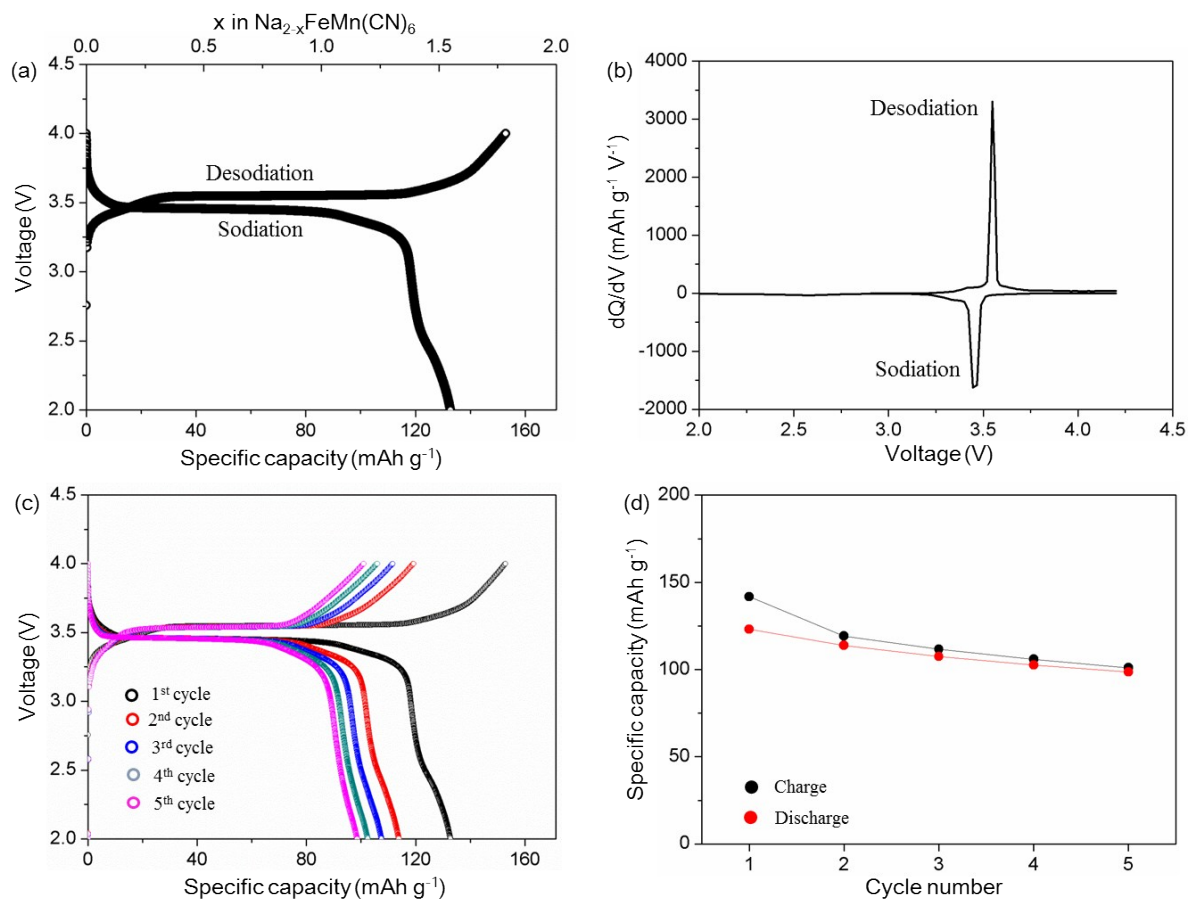

**Fig. S4** (a) Initial charge (desodiation) and discharge (sodiation) curves between 2.0 V vs. 4.0 Na/Na<sup>+</sup> with a constant specific current of 0.1 C rate, and (b) corresponding  $dQ/dV$  profiles. (c) Charge and discharge curves from the first to fifth cycles under the same condition as (a). (d) The corresponding specific capacities as a function of cycle number.
